# Supplementary material for: Electrochemical luminescence modulation in a Eu(iii) complex-modified TiO2 electrode
Source: Royal Society of Chemistry journal article supplement (doi:10.1039/c4tc02996h), 2015-01-01
Supplement: c4tc02996h2.pdf [file c4tc02996h2.pdf]

## *Supporting information*

### **Electrochemical luminescence modulation in a Eu(III) complex-modified TiO<sub>2</sub> electrode**

Kenji Kanazawa, Kazuki Nakamura, and Norihisa Kobayashi\*

*Department of Image and Materials, Graduate School of Advanced Integration Science,  
Chiba University, 1-33 Yayoi-cho, Inage-ku, Chiba 263-8522, Japan*

*\*E-mail: koban@faculty.chiba-u.jp;  
Fax: +81-43-290-3490; Tel: +81-43-290-3457*

#### **Table of Contents**

|                                                                                                                                                                |    |
|----------------------------------------------------------------------------------------------------------------------------------------------------------------|----|
| 1. SEM-EDS analysis of Eu(tta) <sub>3</sub> dc bpy-modified electrode.....                                                                                     | S1 |
| 2. Measurement configuration of the fluorescence spectroelectrochemical cell.....                                                                              | S2 |
| 3. Emission decay profiles of Eu(tta) <sub>3</sub> (H <sub>2</sub> O) <sub>2</sub> and Eu(tta) <sub>3</sub> dc bpy-modified TiO <sub>2</sub><br>electrode..... | S3 |
| 4. Measurement configuration of the fluorescence spectroelectrochemical cell.....                                                                              | S4 |
| 5. Emission decay profiles of Eu(tta) <sub>3</sub> dc bpy-modified TiO <sub>2</sub> electrode under open<br>circuit and application potential.....             | S5 |
| 6. Absorption spectra of tta and Eu(tta) <sub>3</sub> (H <sub>2</sub> O) <sub>2</sub> .....                                                                    | S6 |
| 7. Cyclic voltammograms of tta and Eu(tta) <sub>3</sub> (H <sub>2</sub> O) <sub>2</sub> .....                                                                  | S7 |

## 1. SEM-EDS analysis of $\text{Eu}(\text{tta})_3\text{dcbpy}$ -modified electrode

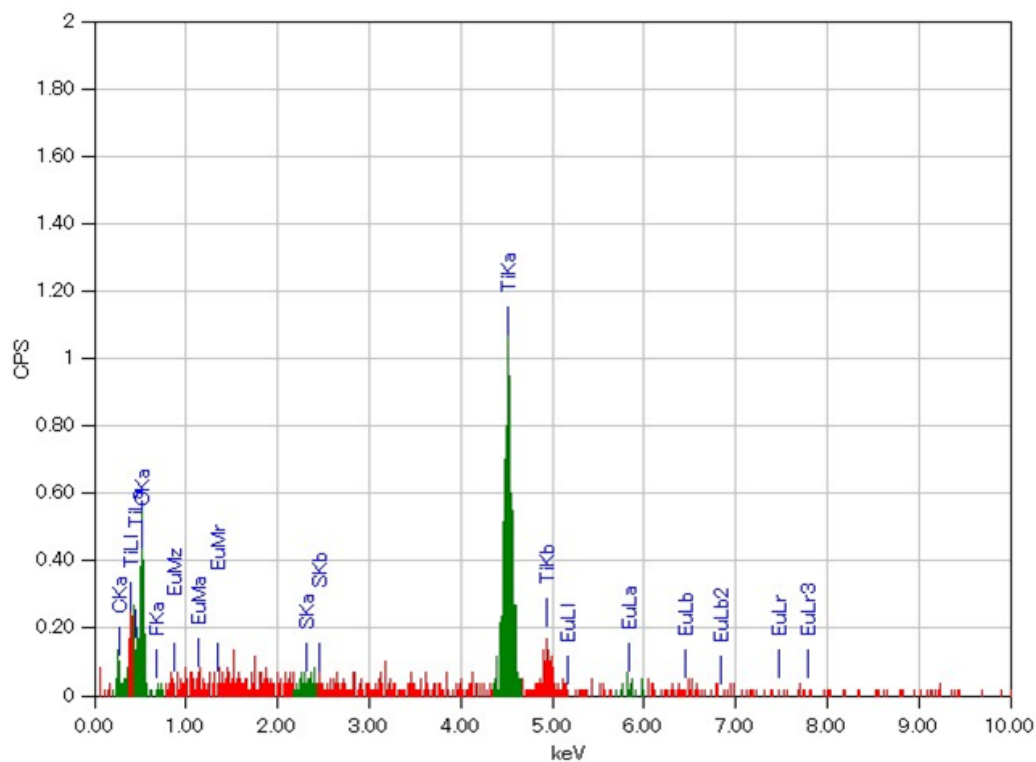

**Fig. S1** EDS spectrum of the  $\text{Eu}(\text{tta})_3\text{dcbpy}$ -modified electrode.

**Table. S1** Elemental ratio of the  $\text{Eu}(\text{tta})_3\text{dcbpy}$ -modified electrode.

| Element | Atomic [%] |
|---------|------------|
| C       | 13.85      |
| O       | 61.30      |
| F       | —          |
| S       | 0.14       |
| Ti      | 23.97      |
| Eu      | 0.73       |

## 2. Measurement configuration of the fluorescence spectroelectrochemical cell

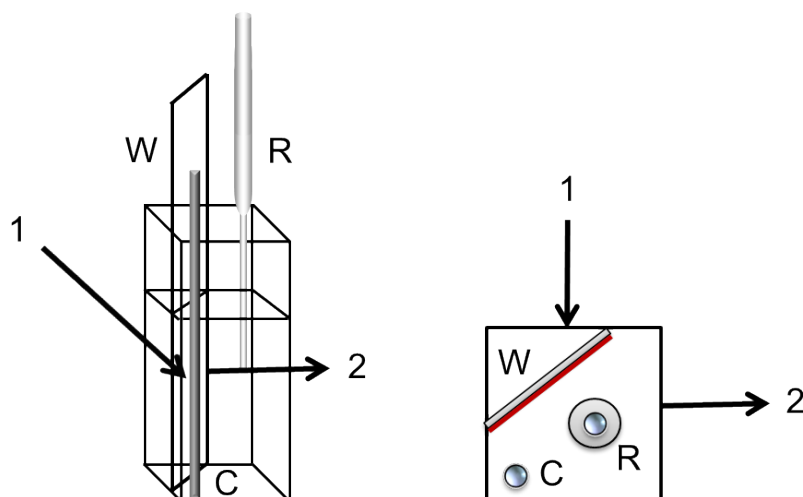

**Fig. S2** Schematic representation of measurement configuration of the fluorescence spectroelectrochemical cell: connection for (W) working, (R) reference, and (C) counter electrode: Eu(tta)<sub>3</sub>dc bpy-modified electrode, Ag/AgCl, and Pt wire. (1) Excitation source. (2) Emission detector.

### 3. Emission decay profiles of $\text{Eu}(\text{tta})_3(\text{H}_2\text{O})_2$ and $\text{Eu}(\text{tta})_3\text{dcbpy}$ -modified $\text{TiO}_2$ electrode

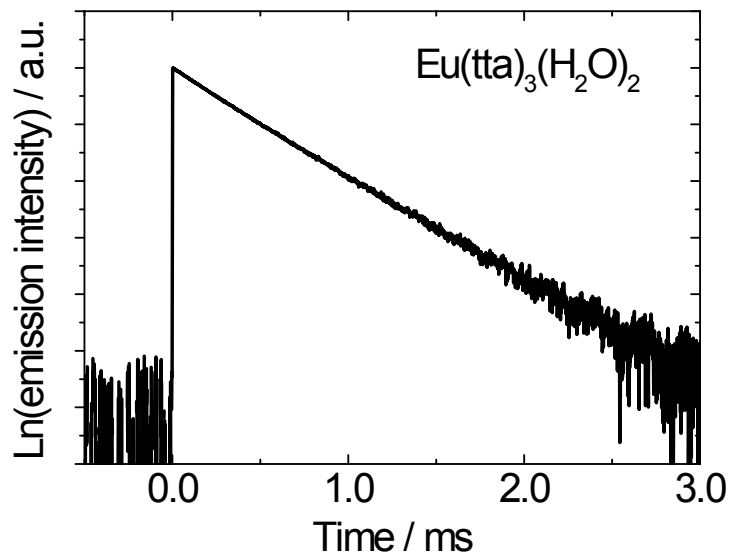

**Fig. S3** Emission decay profile of the PC solution containing  $50 \mu\text{M}$   $\text{Eu}(\text{tta})_3(\text{H}_2\text{O})_2$  by using the quartz cell whose path length is 1 mm. Excitation wavelength is 337 nm.

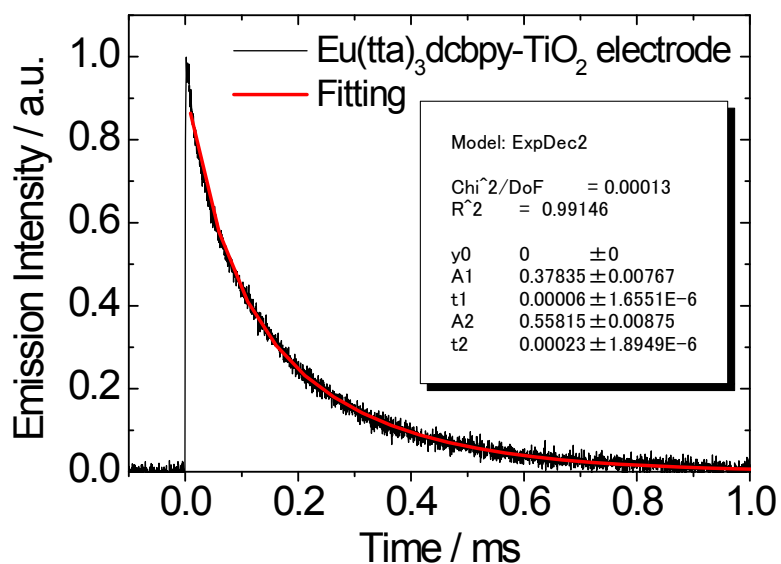

**Fig. S4** Emission decay curves of  $\text{Eu}(\text{tta})_3\text{dcbpy}$ -modified  $\text{TiO}_2$  electrode without solution. Excitation wavelength is 337 nm. Fitting function was employed biexponential decay.

#### 4. Measurement configuration of the fluorescence spectroelectrochemical cell

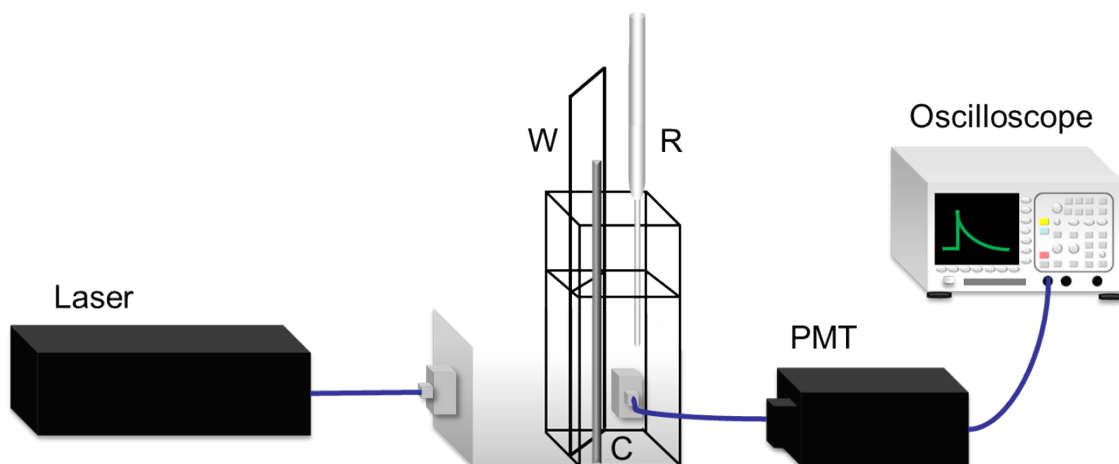

**Fig. S5** Schematic representation of emission lifetime measurement system: connection for (W) working, (R) reference, and (C) counter electrode:  $\text{Eu}(\text{tta})_3\text{dcbpy}$  complex-modified electrode,  $\text{Ag}/\text{AgCl}$ , and Pt wire. Wavelength of the laser is 337 nm.

## 5. Emission decay profiles of $\text{Eu}(\text{tta})_3\text{dcbpy}$ modified $\text{TiO}_2$ electrode

under open circuit and application potential

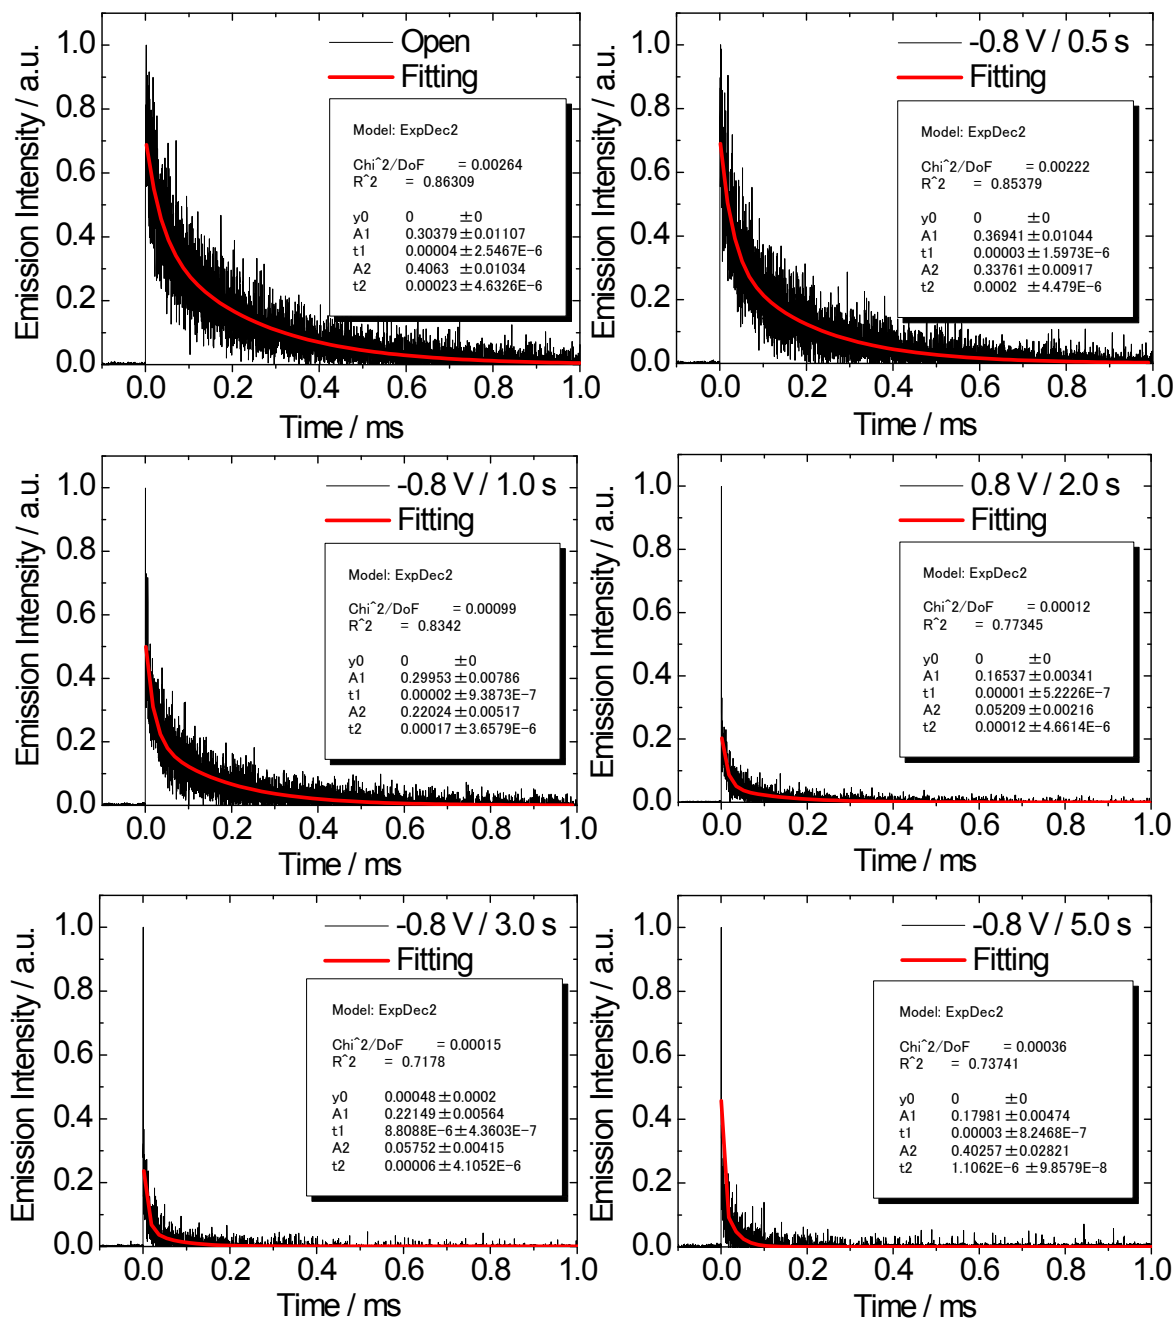

**Fig. S6** Emission decay curves of  $\text{Eu}(\text{tta})_3\text{dcbpy}$  modified on  $\text{TiO}_2$  electrode by irradiated at 337 nm when the potential at -0.8 V (vs. Ag/AgCl) was applied to the cell for 0, 0.5, 1, 2, 3, and 5 s.

6. Absorption spectra of tta and  $\text{Eu}(\text{tta})_3(\text{H}_2\text{O})_2$

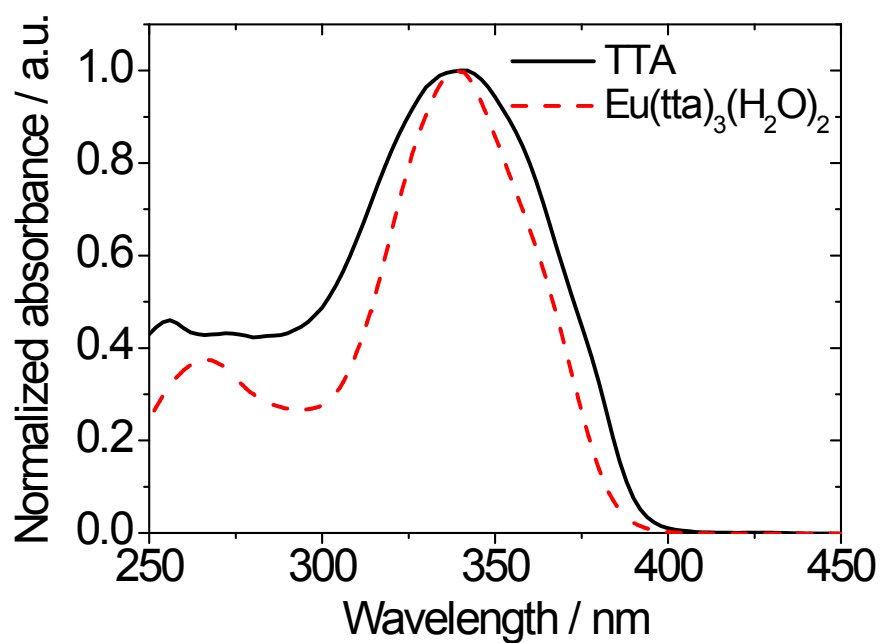

**Fig. S7** Normalized absorption spectra of TTA (10  $\mu\text{M}$ , black line) and  $\text{Eu}(\text{tta})_3(\text{H}_2\text{O})_2$  (10  $\mu\text{M}$ , red dashed line) in PC solution.

7. Cyclic voltammograms of TTA and  $\text{Eu}(\text{tta})_3(\text{H}_2\text{O})_2$

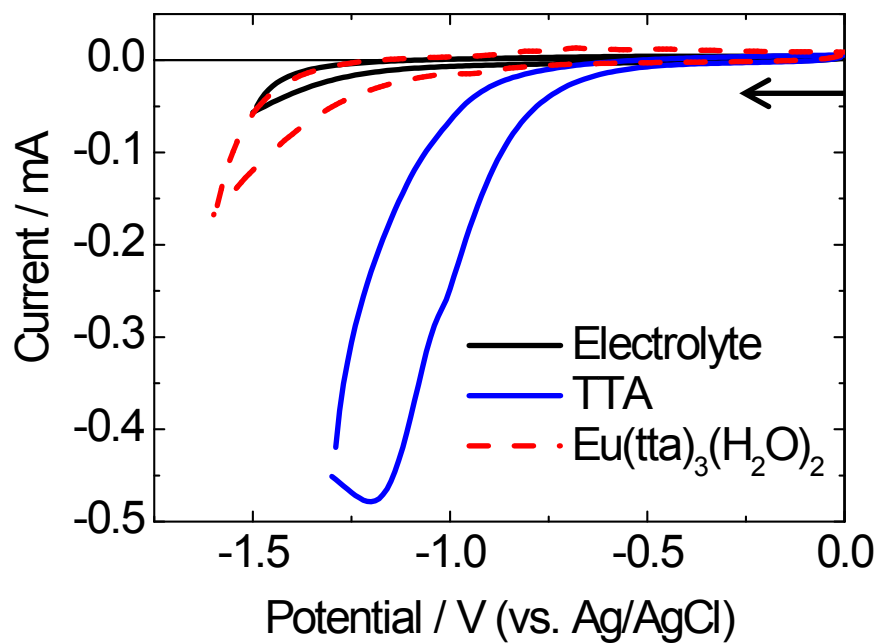

**Fig. S8** CVs of PC solution containing in tta (10 mM, blue line) or  $\text{Eu}(\text{tta})_3(\text{H}_2\text{O})_2$  (10 mM, red dashed line) and  $\text{LiClO}_4$  (200 mM, black line). Scan rate was 50 mV/s.
